# Supplementary material
Source: PubMed Central journal article supplement (PMC4873445)

Supplementary Figure 3:

**Patient ID 1708**

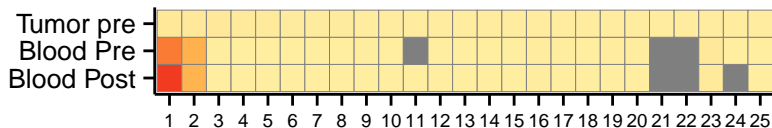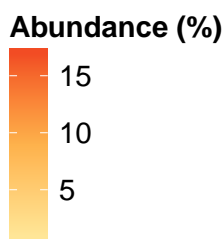

**Patient ID 6815**

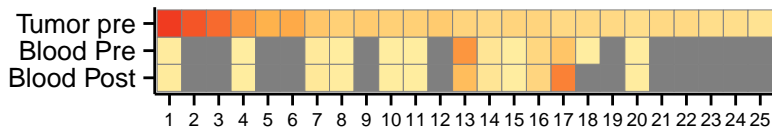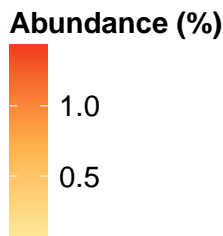

**Patient ID 17232**

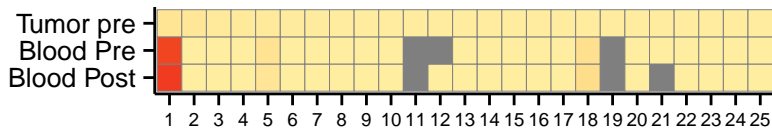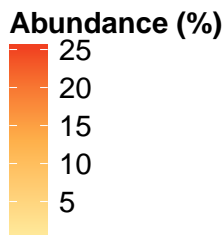

**Patient ID 21828**

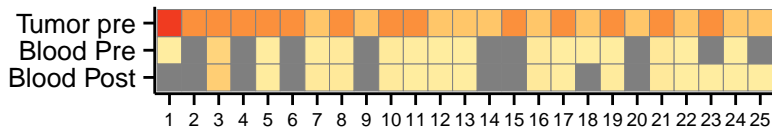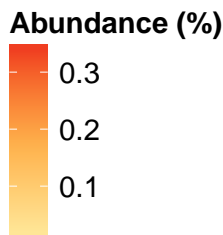

**Patient ID 32204**

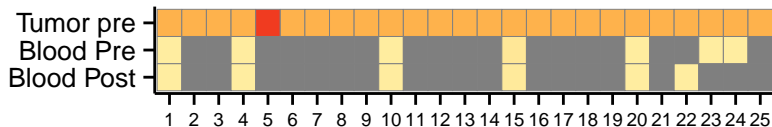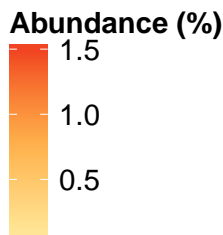

Supplement: NIHMS778450-supplement-3.pdf [file NIHMS778450-supplement-3.pdf]
